# Supplementary material
Source: publisher figshare collection journal article supplement (https://acs.figshare.com/ndownloader/files/5107099)
Supplement: Supplementary file 1 [file 5107099]

# Supporting Information

## Isolation and Low-Temperature X-ray Analysis of Intramolecular Triarylmethane-Triarylmethylum Complex: Preference for a C-H Bridged Unsymmetric Structure Exhibiting a Facile 1,5-Hydride Shift and Charge-Transfer Interaction

*Hidetoshi Kawai, Takashi Takeda, Kenshu Fujiwara, and Takanori Suzuki\**

Division of Chemistry, Graduate School of Science, Hokkaido University,  
Sapporo 060-0810, Japan

---

|                                                                                                                       |     |        |
|-----------------------------------------------------------------------------------------------------------------------|-----|--------|
| Experimental procedures                                                                                               | --- | p. S2  |
| VT-NMR data of <b>1b</b> <sup>+</sup> OTf <sup>-</sup> salt in CD <sub>2</sub> Cl <sub>2</sub> (Figure S1)            | --- | p. S11 |
| ORTEP drawing of <b>1a</b> <sup>+</sup> OTf <sup>-</sup> •acetone (Figure S2)                                         | --- | p. S12 |
| ORTEP drawing of <b>1b</b> <sup>+</sup> OTf <sup>-</sup> •chloroform (Figure S3)                                      | --- | p. S12 |
| ORTEP drawing of <b>3a</b> (Figure S4)                                                                                | --- | p. S13 |
| HOMO and LUMO of <b>1a</b> <sup>+</sup> and <b>1b</b> <sup>+</sup> (Figure S5, S6)                                    | --- | p. S14 |
| UV/Vis spectra of <b>1a</b> <sup>+</sup> OTf <sup>-</sup> and <b>1b</b> <sup>+</sup> OTf <sup>-</sup> (Figure S7, S8) | --- | p. S15 |
| Optimized geometry of <b>1a</b> <sup>+</sup> at B3LYP/6-31G(d)                                                        | --- | p. S16 |
| Optimized geometry of <b>1b</b> <sup>+</sup> at B3LYP/6-31G(d)                                                        | --- | p. S18 |
| References                                                                                                            | --- | p. S20 |

## Experimental procedures

**General:**  $^1\text{H}$  and  $^{13}\text{C}$  NMR spectra were recorded on a JEOL AL300 or ECP-300 ( $^1\text{H}$ /300 MHz,  $^{13}\text{C}$ /75 MHz) spectrometer. VT NMR ( $^1\text{H}$  and  $^{13}\text{C}$ ) and  $^2\text{H}$  NMR spectra were recorded on a JEOL AL300,  $\alpha$ 400 ( $^1\text{H}$ /400 MHz,  $^{13}\text{C}$ /100 MHz) or  $\alpha$ 500 ( $^1\text{H}$ /500 MHz,  $^2\text{H}$ /77 MHz and  $^{13}\text{C}$ /125 MHz) spectrometer.  $^{13}\text{C}$ - $^1\text{H}$  coupling constants were measured by a HSQC method on a  $\alpha$ 500 spectrometer at the High-Resolution NMR Laboratory (Hokkaido University). IR spectra were taken on a JASCO model FT/IR-230 infrared spectrophotometer. Mass spectra were recorded on JEOL JMS-600H (EI) and JMS-AX500 or JEOL JMS-SX102A (FAB) spectrometers. Column chromatography were performed on silica gel I-6-40 (YMG) of particle size 40-63  $\mu\text{m}$  and aluminum oxide 90 standardized (Merck). Elemental analyses were taken on a Yanako MT-6 CHN corder at the Center for Instrumental Analysis of Hokkaido University. UV/Vis spectra were recorded on a Hitachi U-3500 spectrophotometer. 1,8-dibromonaphthalene<sup>1</sup> and 5,6-dibromoacenaphthene<sup>2</sup> were prepared following the known procedures. Other reagents and solvents were obtained from commercial sources and purified prior to use.

### Scheme. Preparation of **1a,b**<sup>+</sup> salts

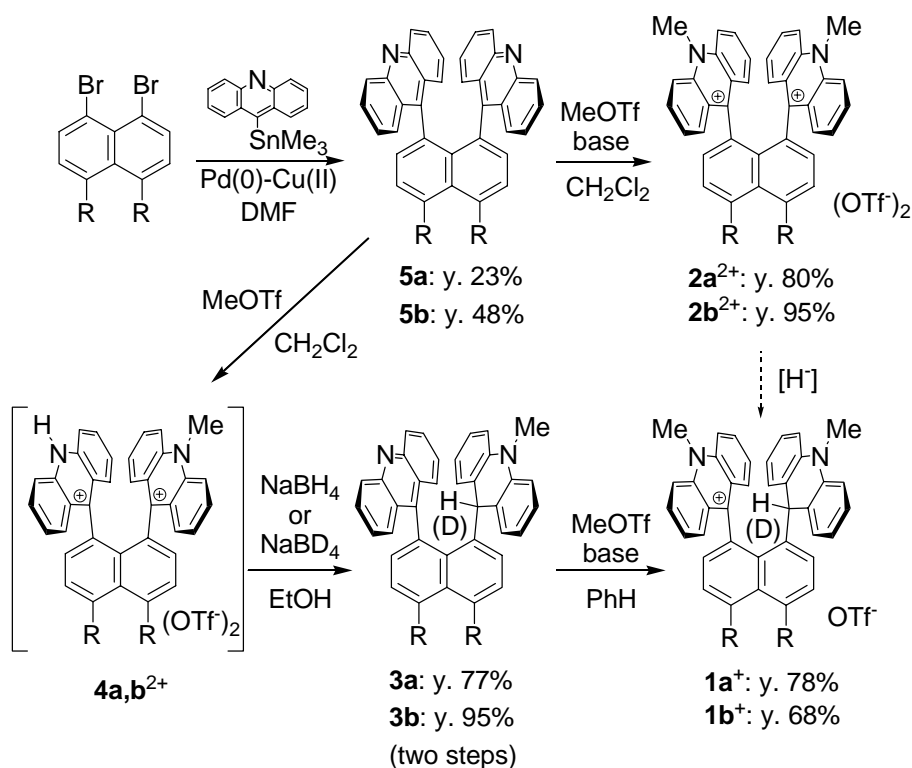

a: R = H; b: R, R = -CH<sub>2</sub>CH<sub>2</sub>-

### Preparation of 9-Bromoacridine<sup>3</sup>

The mixture of *N*-phenylanthranilic acid (5.50 g, 58.1 mmol) and POBr<sub>3</sub> (50.0 g, 174 mmol) was heated without solvent at 120°C. A violent fuming reaction occurred within 10 min (CAUTION! This reaction should be done in a hood). After heated for 2 h, the resulting solid was allowed to cool to room temperature, and carefully added to 25% aqueous ammonium hydroxide and chloroform. The mixture was extracted with chloroform. The organic layer was washed with 5% aqueous ammonium hydroxide and brine, and dried over Na<sub>2</sub>SO<sub>4</sub>. Evaporation of the solvent gave 9-bromoacridine (14.1 g, 94%) as a brown solid. This compound was used in the next reaction without purification; M.p. (113-114 °C, *lit.* 116 °C<sup>3</sup>); <sup>1</sup>H NMR (CDCl<sub>3</sub>) δ 8.42 (dd, *J* = 8.4, 1.2 Hz, 2H), 8.22 (d, *J* = 8.6 Hz, 2H), 7.80 (ddd, *J* = 8.4, 6.6, 1.2 Hz, 2H), 7.64 (ddd, *J* = 8.4, 6.6, 1.2 Hz, 2H).

### Preparation of 9-Trimethylstannylacridine

To a suspension of 9-bromoacridine (5.50 g, 21.3 mmol) in dry ether (300 mL) was added *n*-BuLi in *n*-hexane (1.58 M, 15.1 mL, 25.6 mmol) at -78°C under argon. After 15 min, Me<sub>3</sub>SnCl in *n*-hexane (1.0 M, 26.0 mL, 26.0 mmol) was added. The mixture was allowed to warm to 23°C and stirred for 18 h. Then, the resulting suspension was filtered to remove the insoluble material. The yellow solid obtained by evaporation of the solvent was subjected to chromatography on SiO<sub>2</sub> eluting with hexane/EtOAc/Et<sub>3</sub>N (100:10:1) to give 9-trimethylstannylacridine (6.25 g, 84%) as a yellow solid; M.p. 86-87°C; <sup>1</sup>H NMR (CDCl<sub>3</sub>) δ 8.25 (dd, *J* = 8.6, 1.3 Hz, 2H), 8.14 (dd, *J* = 8.6, 1.3 Hz, 2H), 7.76 (ddd, *J* = 8.6, 6.6, 1.3 Hz, 2H), 7.53 (ddd, *J* = 8.6, 6.6, 1.3 Hz, 2H), 0.68 (s, 9H); <sup>13</sup>C NMR (CDCl<sub>3</sub>) δ 157.37, 147.79, 133.48, 130.69, 130.08, 129.56, 125.29, -4.58; IR (KBr) 2360, 2337, 1533, 1515, 1460, 1394, 1196, 1141, 1127, 1011, 859, 832, 782, 761, 745, 670, 660, 604, 537, 523, 514 cm<sup>-1</sup>; LR-MS (EI) *m/z* (%): 343(M<sup>+</sup>, 22), 324 (32), 298 (50), 296 (38), 178 (bp), 177 (49), 152 (37), 151 (55), 150 (32), 135 (33); Anal. Calcd (%) for C<sub>16</sub>H<sub>17</sub>NSn: C 56.19, H 5.10, N 4.10; found C 56.10, H 4.96, N 4.05.

### Preparation of 9,9'-(Naphthalene-1,8-diyl)bisacridine 5a<sup>4</sup>

To a solution of 1,8-dibromonaphthalene<sup>1</sup> (399 mg, 1.41 mmol) in dry DMF (20 mL) were added CuO (487 mg, 2.81 mmol) and then Pd(PPh<sub>3</sub>)<sub>4</sub> (224 mg, 422 μmol).<sup>5</sup> After bubbling with argon for ca. 40 min, a portion (5 mL) of dry DMF solution (20 mL) of 9-trimethylstannylacridine (2.61 g, 7.63 mmol) was added. Then, the resulting mixture was heated at 100°C for 15 min and at 140°C for 50 min under argon. Then, the remaining 9-trimethylstannylacridine solution was added to the mixture at this temperature. After 21 h, 5% aqueous ammonium hydroxide (20 mL)

and chloroform (20 mL) were added to the reaction mixture, and then the precipitates were filtered. The solid was transferred on a thimble filter fitted in the Soxhlet apparatus, and extracted with refluxing chloroform (300 mL) for 3 h. The orange solid obtained by evaporation of the solvent mostly contains 9,9'-biacridinyl and was discarded. The remaining solid on the thimble filter was further extracted with refluxing chloroform (300 mL) in the Soxhlet apparatus for 48 h. The second extract was concentrated in vacuo to give **5a** (153 mg, 23%) as a yellow solid. Single crystals for the X-ray analysis were obtained by recrystallization from  $\text{CHCl}_3$ /hexane: M.p. 245-247°C (decomp.);  $^1\text{H}$  NMR ( $\text{CD}_2\text{Cl}_2$ )  $\delta$  8.24 (dd,  $J = 8.4, 1.4$  Hz, 2H), 7.67 (dd,  $J = 8.4, 6.9$  Hz, 2H), 7.52 (dd, 4H,  $J = 8.4, 1.2$  Hz), 7.29 (ddd,  $J = 8.4, 6.6, 1.4$  Hz, 4H), 7.19 (dd,  $J = 6.9, 1.4$  Hz, 2H), 6.72 (dd,  $J = 8.4, 1.4$  Hz, 4H), 6.61 (ddd,  $J = 8.4, 6.6, 1.2$  Hz, 4H); The  $^{13}\text{C}$  NMR could not be measured due to its low solubility. IR (KBr) 3045, 1558, 1540, 1517, 1436, 1145, 1014, 866, 827, 785, 752, 601  $\text{cm}^{-1}$ ; UV/Vis ( $\text{CH}_2\text{Cl}_2$ ):  $\lambda_{\text{max}}$  ( $\epsilon / \text{M}^{-1} \text{cm}^{-1}$ ) = 347 (12600), 360 (13400), 390 nm (6000, sh); Fluorescence ( $\text{CH}_2\text{Cl}_2$ ,  $\lambda_{\text{ex}} = 360$  nm)  $\lambda_{\text{max}} = 536$  nm; LR-MS (EI)  $m/z$  (%): 484 ( $\text{M}^+ + 2\text{H}$ , 57), 483(23), 482( $\text{M}^+$ , bp), 241(87), 240 (65), 207 (66), 196 (60), 171 (63), 166 (64), 138 (63), 122 (61), 121 (63), 93 (64), 80 (63), 52 (58); HR-MS (EI) found 482.1778, calcd. for  $\text{C}_{36}\text{H}_{22}\text{N}_2$ : 482.1783; Anal. Calcd (%) for  $\text{C}_{36}\text{H}_{22}\text{N}_2 + 0.50 \text{CHCl}_3$ : C 80.84, H 4.18, N 5.17; found C 80.88, H 4.48, N 5.20.

### Preparation of 9,9'-(Acenaphthene-5,6-diyl)bisacridine **5b**

To a solution of 5,6-dibromoacenaphthene<sup>2</sup> (1.15 g, 3.69 mmol) in dry DMF (60 mL) were added CuO (683 mg, 8.59 mmol) and then  $\text{Pd}(\text{PPh}_3)_4$  (1.31 g, 1.13 mmol). After bubbling with argon for ca. 30 min, a portion (15 mL) of dry DMF solution (60 mL) of 9-trimethylstannylacridine (4.99 g, 14.6 mmol) was added. Then, the resulting mixture was heated at 100°C for 30 min and at 140°C for 15 min under argon. Then, the remaining 9-trimethylstannylacridine solution was added to the mixture at this temperature. After 21 h, 5% aqueous ammonium hydroxide (100 mL) was added and extracted with chloroform. The organic layer was washed with 5% aqueous ammonium hydroxide and brine, dried over  $\text{Na}_2\text{SO}_4$ . The black solid obtained by evaporation of the solvent was subjected to chromatography on  $\text{SiO}_2$  eluting with  $\text{CHCl}_3/\text{Et}_3\text{N}$  (100:1) to give **5b** (888 mg, 48%) as a yellow solid. Single crystals for the X-ray analysis were obtained by recrystallization from  $\text{CHCl}_3$ /AcOEt: M.p. 270-272°C (decomp.);  $^1\text{H}$  NMR ( $\text{CDCl}_3$ )  $\delta$  7.69 (d,  $J = 8.4$  Hz, 4H), 7.55 (d,  $J = 7.0$  Hz, 2H), 7.34 (ddd,  $J = 8.4, 6.4, 1.1$  Hz, 4H), 7.25 (d,  $J = 7.0$  Hz, 2H), 6.94 (dd,  $J = 8.6, 1.1$  Hz, 4H), 6.68 (ddd,  $J = 8.6, 6.4, 1.1$  Hz, 4H), 3.74 (s, 4H);  $^{13}\text{C}$  NMR ( $\text{CDCl}_3$ )  $\delta$  147.55, 146.71, 145.89, 140.28, 131.92, 131.76, 128.93, 128.79, 126.25, 124.94, 124.57, 119.50, 30.51; IR (KBr) 3042, 2916, 1629, 1600, 1556, 1515, 1460, 1435, 1408, 1329, 1151, 1013, 868, 745, 647, 626, 603  $\text{cm}^{-1}$ ; UV/Vis ( $\text{CH}_2\text{Cl}_2$ ):  $\lambda_{\text{max}}$  ( $\epsilon / \text{M}^{-1} \text{cm}^{-1}$ ) = 349 (12200), 360 (12900), 390 nm (6200, sh); Fluorescence ( $\text{CH}_2\text{Cl}_2$ ,  $\lambda_{\text{ex}} = 360$  nm)  $\lambda_{\text{max}} = 525$  nm; LR-MS

(EI)  $m/z$  (%): 509 (42), 508 ( $M^+$ , bp), 254 (19); HR-MS (EI) found 508.1940, calcd. for  $C_{38}H_{24}N_2$ : 508.1939; Anal. Calcd (%) for  $C_{38}H_{24}N_2 + 0.33 H_2O$ : C 88.69, H 4.83, N 5.44; found C 88.42, H 4.75, N 5.41.

### Preparation of 9-[8-(10-Methylacridan-9-yl)naphthalen-1-yl]acridine **3a** and **3a-d**

To a suspension of 9,9'-(naphthalene-1,8-diyl)bisacridine **5a** (27.3 mg, 57  $\mu$ mol) in dry  $CH_2Cl_2$  (20 mL) was added MeOTf (900  $\mu$ L, 8.0 mmol). After stirring for 21h at 23°C under argon, the mixture was diluted with ether and the resulting precipitates were filtered. The insoluble material was washed with ether to give a mixture of mono methylated dication salt **4a** and a small amount of dimethylated dication **2a**. The mixture was used in the next reaction without further purification.

To a solution of a mixture of **4a** and **2a** in ethanol (20 mL) was added  $NaBH_4$  (73 mg, 193  $\mu$ mol). After the mixture was stirred for 25h at 23 °C, the solvent was evaporated. The obtained yellow solid was suspended with water and the mixture was extracted with AcOEt. The combined organic layer was washed with brine, dried over  $Na_2SO_4$ , and filtered. The yellow solid obtained by evaporation of the solvent was subjected to chromatography on  $Al_2O_3$  eluting with  $CH_2Cl_2$ /hexane (1:1) to give **3a** (22 mg, 77%) as a yellow solid. Single crystals for the X-ray analysis were obtained by recrystallization from  $CH_2Cl_2$ /hexane: M.p. 280-285 °C (decomp.);  $^1H$  NMR ( $CDCl_3$ )  $\delta$  8.16 (dd,  $J$  = 8.4, 1.2 Hz, 1H), 8.08 (d,  $J$  = 8.8 Hz, 2H), 8.03 (dd,  $J$  = 8.0, 1.5 Hz, 1H), 7.65 (dd,  $J$  = 8.0, 7.2 Hz, 1H), 7.61-7.54 (m, 3H), 7.49 (dd,  $J$  = 7.2, 1.5 Hz, 1H), 7.45 (dd,  $J$  = 8.4, 0.6 Hz, 2H), 7.41 (dd,  $J$  = 6.6, 1.2 Hz, 1H), 7.15 (ddd,  $J$  = 8.4, 6.6, 1.2 Hz, 2H), 6.87 (td,  $J$  = 7.5, 1.2 Hz, 2H), 6.48 (dd,  $J$  = 7.5, 1.2 Hz, 2H), 6.40 (dd,  $J$  = 7.5, 1.2 Hz, 2H), 6.10 (dd,  $J$  = 7.5, 1.2 Hz, 2H), 4.52 (s, 1H), 3.04 (s, 3H);  $^{13}C$  NMR ( $CDCl_3$ )  $\delta$  148.95, 148.57, 141.74, 140.16, 135.19, 132.90, 132.60, 132.08, 131.32, 130.79, 129.96, 129.57, 129.10, 128.66, 128.08, 127.19, 127.06, 126.36, 126.19, 125.19, 124.43, 119.41, 111.04, 43.07, 32.96; IR (KBr) 3059, 3037, 2960, 2926, 1589, 1503, 1477, 1456, 1359, 1322, 1273, 781, 744  $cm^{-1}$ ; LR-MS (EI)  $m/z$  (%): 500 (20), 499 (46), 498 ( $M^+$ , bp), 497 (24), 496 (22), 484 (27), 483 (55), 249 (28), 194 (48); HR-MS (EI) found 498.2096, calcd. for  $C_{37}H_{26}N_2$ : 498.2096; Anal. Calcd (%) for  $C_{37}H_{26}N_2 + 0.25 H_2O$ : C 88.33, H 5.31, N 5.57; found C 88.40, H 5.55, N 5.35.

Compound **3a-d** was prepared from **5a** by using  $NaBD_4$  in place of  $NaBH_4$  following the same protocol to **3a** (2 steps, 41% yield): M.p. 270-271 °C (decomp.);  $^1H$  NMR (300 MHz,  $CDCl_3$ )  $\delta$  8.16 (dd,  $J$  = 8.4, 1.2 Hz, 1H), 8.07 (d,  $J$  = 8.8 Hz, 2H), 8.03 (dd,  $J$  = 8.0, 1.5 Hz, 1H), 7.64 (dd,  $J$  = 8.0, 7.2 Hz, 1H), 7.60-7.53 (m, 3H), 7.49 (dd,  $J$  = 7.2, 1.5 Hz, 1H), 7.44 (d,  $J$  = 8.6 Hz, 2H), 7.40 (dd,  $J$  = 6.6, 1.2 Hz, 1H), 7.14 (ddd,  $J$  = 8.6, 6.6, 1.1 Hz, 2H), 6.86 (td,  $J$  = 7.5, 1.5 Hz, 2H), 6.48 (d,  $J$  = 7.5 Hz, 2H), 6.40 (dt,  $J$  = 7.5, 1.1 Hz, 2H), 6.10 (dd,  $J$  = 7.5, 1.5 Hz, 2H), 3.04 (s,

3H);  $^{13}\text{C}$  NMR ( $\text{CDCl}_3$ )  $\delta$  148.91, 148.62, 141.78, 140.07, 135.22, 132.90, 132.56, 132.13, 131.30, 130.78, 129.92, 129.16, 128.66, 128.03, 127.19, 127.05, 126.36, 126.20, 125.24, 125.19, 124.44, 119.42, 111.05, 32.95; IR (KBr) 3056, 2958, 2926, 2872, 1625, 1605, 1589, 1556, 1539, 1514, 1459, 1439, 1343, 1301, 1261, 1209, 1200, 1160, 1144, 1129, 1045, 862, 783, 776, 746, 651, 638, 618, 601  $\text{cm}^{-1}$ ; LR-MS (EI)  $m/z$  (%): 500 (43), 499( $\text{M}^+$ , bp), 498 (20), 484 (29), 250 (27), 195 (30); HR-MS (EI) found 499.2163, calcd. for  $\text{C}_{37}\text{H}_{25}\text{DN}_2$ : 499.2158.

### Preparation of 9-[6-(10-Methylacridan-9-yl)acenaphthen-5-yl]acridine **3b** and **3b-d**

Compound **3b** was prepared from **5b** (41.0 mg, 81  $\mu\text{mol}$ ) following the same protocol to **3a** [MeOTf (860  $\mu\text{L}$ , 7.6 mmol) and  $\text{NaBH}_4$  (144 mg, 3.8  $\mu\text{mol}$ )] as a yellow solid (40 mg, 95%): M.p. 220-223  $^\circ\text{C}$  (decomp.);  $^1\text{H}$  NMR ( $\text{CDCl}_3$ )  $\delta$  8.16 (dd,  $J = 8.6, 1.2$  Hz, 2H), 7.65-7.58 (m, 4H), 7.46 (d,  $J = 7.2$  Hz, 1H), 7.40 (d,  $J = 7.5$  Hz, 1H), 7.36 (d,  $J = 7.2$  Hz, 1H), 7.32 (d,  $J = 7.5$  Hz, 1H), 7.24 (dd,  $J = 8.6, 7.2$  Hz, 2H), 6.87 (tt,  $J = 8.1, 0.6$  Hz, 2H), 6.54 (d,  $J = 8.1$  Hz, 2H), 6.39 (t,  $J = 7.5$  Hz, 2H), 6.07 (d,  $J = 7.5, 1.1$  Hz, 2H), 4.35 (s, 1H), 3.60-3.48 (m, 4H), 3.10 (s, 3H);  $^{13}\text{C}$  NMR ( $\text{CD}_2\text{Cl}_2$ )  $\delta$  148.58 (br), 148.19, 145.58, 141.24, 139.97, 132.23, 132.69, 132.22, 129.77, 129.35 (br), 127.90, 127.70, 127.40, 127.28, 126.15, 125.61, 125.25, 120.47, 119.11, 118.31, 111.51, 41.80, 32.65, 30.05, 29.76; IR (KBr) 1606, 1590, 1461, 1346, 1266, 1131, 866, 752  $\text{cm}^{-1}$ ; LR-MS (EI)  $m/z$  (%): 525 (64), 524 ( $\text{M}^+$ , bp), 523 (49), 510 (52), 509 (69), 328 (53), 262 (40), 194 (51), 179 (50); HR-MS (EI) found 524.2257, calcd. for  $\text{C}_{39}\text{H}_{28}\text{N}_2$ : 524.2252; Anal. Calcd. (%) for  $\text{C}_{39}\text{H}_{28}\text{N}_2 + 0.50 \text{H}_2\text{O}$ : C 86.32, H 5.57, N 5.16; found C 86.06, H 5.43, N 5.12.

Compound **3b-d** was prepared from **5b** by using  $\text{NaBD}_4$  in place of  $\text{NaBH}_4$  following the same protocol to **3a** (2 steps, 77% yield): M.p. 233-235  $^\circ\text{C}$  (decomp.);  $^1\text{H}$  NMR (300 MHz,  $\text{CDCl}_3$ )  $\delta$  8.14 (d,  $J = 8.6$  Hz, 2H), 7.67-7.58 (m, 4H), 7.47 (d,  $J = 6.9$  Hz, 1H), 7.41 (d,  $J = 7.2$  Hz, 1H), 7.36 (d,  $J = 7.2$  Hz, 1H), 7.32 (d,  $J = 6.9$  Hz, 1H), 7.24 (m, 2H), 6.88 (td,  $J = 7.8, 1.5$  Hz, 2H), 6.54 (d,  $J = 7.8$  Hz, 2H), 6.40 (td,  $J = 7.8, 0.6$  Hz, 2H), 6.08 (dd,  $J = 7.8, 1.5$  Hz), 3.61-3.52 (m, 4H), 3.12 (s, 3H);  $^{13}\text{C}$  NMR ( $\text{CDCl}_3$ )  $\delta$  148.82, 148.74, 148.06, 145.46, 141.64, 140.19, 137.87, 133.11, 132.50, 130.67, 129.97, 129.38, 128.06, 127.76, 127.51, 126.23, 125.86, 125.26, 120.84, 119.40, 118.46, 111.35, 32.94, 30.32, 30.07; IR (KBr) 3070, 3037, 2924, 2854, 1605, 1592, 1514, 1470, 1435, 1345, 1278, 1269, 1132, 874, 757, 751  $\text{cm}^{-1}$ ; LR-MS (EI)  $m/z$  (%): 526 (50), 525 ( $\text{M}^+$ , bp), 524 (28), 510 (28), 278 (39), 263 (36), 195 (28); HR-MS (EI) found 525.2318, calcd. for  $\text{C}_{39}\text{H}_{27}\text{DN}_2$ : 525.2314.

### Preparation of 10-Methyl-9-[8-(10-methylacridan-9-yl)naphthalen-1-yl]acridinium Triflate **1a<sup>+</sup>OTf<sup>-</sup>** and **1a-d<sup>+</sup>OTf<sup>-</sup>**

To a solution of **3a** (34.3 mg, 69  $\mu$ mol) and 2,6-di-*tert*-butyl-4-methylpyridine (20.0 mg, 97  $\mu$ mol) in dry benzene (10 mL) was added MeOTf (100  $\mu$ L, 884  $\mu$ mol). The mixture was stirred for 80 min at 23 °C under argon, and the resulting black precipitates were filtered. The insoluble material was washed with ether to give **1a<sup>+</sup>OTf<sup>-</sup>** (35.5mg, 78%) as a dark orange solid. Single crystals for the X-ray analysis were obtained by recrystallizing from acetone: M.p. 193-195°C; <sup>1</sup>H NMR (300 MHz, acetone-*d*<sub>6</sub>, -30 °C), 8.46 (d, *J* = 8.1 Hz, 2H), 7.87 (t, *J* = 7.5 Hz, 2H), 7.72-7.53 (m, 10H), 7.08 (t, *J* = 7.5 Hz, 4H), 6.98 (d, *J* = 8.1 Hz, 4H), 4.11 (s, 1H), 4.06 (s, 6H); IR (KBr) 3107, 3034, 2919, 1609, 1589, 1579, 1549, 1479, 1461, 1342, 1275, 1262, 1224, 1193, 1160, 1030, 774, 753, 713, 691, 655, 637, 629, 517 cm<sup>-1</sup>; LR-MS (FAB) *m/z* (%): 515 (22), 514 (44), 513 (M<sup>+</sup>, bp), 194 (51); HR-MS (FAB) found 513.2324, calcd. for C<sub>38</sub>H<sub>29</sub>N<sub>2</sub>: 513.2325; Anal. Calcd (%) for C<sub>39</sub>H<sub>29</sub>F<sub>3</sub>N<sub>2</sub>O<sub>3</sub>S + 0.33C<sub>6</sub>H<sub>6</sub>: C 71.50, H 4.54, N 4.07; found: C 71.24, H 4.79, N 3.92.

Salt **1a-d<sup>+</sup>OTf<sup>-</sup>** was prepared from **3a-d** with MeOTf following the same protocol to **1a<sup>+</sup>OTf<sup>-</sup>** (68% yield): M.p. 193-194 °C (decomp.); <sup>1</sup>H NMR (300 MHz, acetone-*d*<sub>6</sub>, 20 °C)  $\delta$  8.46 (d, *J* = 8.3 Hz, 2H), 7.89 (br t, *J* = 7.5 Hz, 2H), 7.70-7.50 (m, 10H), 7.08 (br. t, *J* = 7.0 Hz, 4H), 7.00 (d, *J* = 8.1 Hz, 4H), 4.07 (s, 6H); <sup>2</sup>D NMR (77 MHz, acetone-*d*<sub>6</sub>, -30 °C)  $\delta$  4.10 (br. s); IR (KBr) 3069, 3034, 1609, 1589, 1579, 1549, 1461, 1385, 1341, 1276, 1262, 1224, 1194, 1162, 1030, 753, 713, 691, 654, 637, 626, 602, 573, 517 cm<sup>-1</sup>; LR-MS (FAB) *m/z* (%): 517 (32), 516 (26), 515 (85), 514 (M<sup>+</sup>, bp), 513 (29), 195 (48), 136 (27); HR-MS (FAB) found 514.2388, calcd. for C<sub>38</sub>H<sub>28</sub>DN<sub>2</sub>: 514.2392.

### Preparation of 10-Methyl-9-[6-(10-methylacridan-9-yl)acenaphthen-5-yl]acridinium Triflate **1b<sup>+</sup>OTf<sup>-</sup>** and **1b-d<sup>+</sup>OTf<sup>-</sup>**

To a solution of **3b** (28.5 mg, 54  $\mu$ mol) and 2,6-di-*tert*-butyl-4-methylpyridine (11.1 mg, 54  $\mu$ mol) in dry benzene (10 mL) was MeOTf (90  $\mu$ L, 823  $\mu$ mol) and stirred for 60 min at 23 °C under argon, and the resulting black precipitates were filtered. The insoluble material was washed with ether to give **1b<sup>+</sup>OTf<sup>-</sup>** (25.4 mg, 68%) as a dark brown solid. Single crystals for the X-ray analysis were obtained by recrystallizing from CHCl<sub>3</sub>: M.p. 248-249 °C; <sup>1</sup>H NMR (300 MHz, acetone-*d*<sub>6</sub>, -10 °C)  $\delta$  7.81-7.57 (br s, 8H), 7.64 (d, *J* = 7.0 Hz, 2H), 7.50 (d, *J* = 7.0 Hz, 2H), 7.18-6.94 (br s, 8H), 4.10 (br s, 6H), 4.00 (s, 1H), 3.65 (s, 4H); <sup>1</sup>H NMR (300 MHz, acetone-*d*<sub>6</sub>, -85 °C)  $\delta$  8.98 (d, *J* = 9.4 Hz, 2H), 8.55 (br. dd, *J* = 9.4, 7.3 Hz, 2H), 8.15(d, *J* = 8.6 Hz, 2H), 7.99 (br. dd, *J* = 8.6, 7.3 Hz, 2H), 7.78 (d, *J* = 7.2 Hz, 1H), 7.68 (d, *J* = 7.2 Hz, 1H), 7.53 (d, *J* = 7.3 Hz, 1H), 7.45 (d, *J* = 7.3 Hz, 1H), 7.03 (br. dd, *J* = 8.3, 7.3 Hz, 2H), 6.82 (d, *J* = 8.3 Hz, 2H), 6.50 (t, *J* = 7.3 Hz, 2H), 5.96 (d, *J* = 7.3 Hz, 2H), 5.16 (s, 3H), 4.19 (s, 1H), 3.66 (d, *J* = 8.3 Hz,

4H), 3.25 (s, 3H); IR (KBr) 3111, 3070, 3037, 2921, 2888, 1607, 1590, 1577, 1547, 1462, 1385, 1343, 1277, 1262, 1224, 1187, 1155, 1045, 1032, 866, 752, 638, 574, 517  $\text{cm}^{-1}$ ; LR-MS (FAB)  $m/z$  (%): 540 (45), 539 ( $\text{M}^+$ , bp), 194 (51); HR-MS (FAB) found 539.2484, calcd. for  $\text{C}_{40}\text{H}_{31}\text{N}_2$ : 539.2482.; Anal. calcd(%) for  $\text{C}_{39}\text{H}_{29}\text{F}_3\text{N}_2\text{O}_3\text{S} + 0.50\text{H}_2\text{O}$  C 70.57, H 4.62, N 4.01; found C 70.69, H 4.61, N 4.09.

Salt **1b-d** $^+\text{OTf}^-$  was prepared from **3b-d** with MeOTf following the same protocol to **1b** $^+\text{OTf}^-$  (63% yield): M.p. 265-267 °C (decomp.);  $^1\text{H}$  NMR (300 MHz, acetone- $d_6$ , -85 °C)  $\delta$  8.98 (d,  $J$  = 9.4 Hz, 2H), 8.55 (t,  $J$  = 8.0 Hz, 2H), 8.17 (d,  $J$  = 8.6 Hz, 2H), 7.99 (t,  $J$  = 8.0, 2H), 7.78 (d,  $J$  = 7.2 Hz, 1H), 7.68 (d,  $J$  = 7.2 Hz, 1H), 7.53 (d,  $J$  = 7.3 Hz, 1H), 7.45 (d,  $J$  = 7.3 Hz, 1H), 7.03 (t,  $J$  = 7.7 Hz, 2H), 6.82 (d,  $J$  = 8.3 Hz, 2H), 6.50 (t,  $J$  = 7.3 Hz, 2H), 5.96 (d,  $J$  = 7.2 Hz, 2H), 5.16 (s, 3H), 3.67 (br s, 4H), 3.25 (s, 3H);  $^2\text{D}$  NMR (77 MHz, acetone- $d_6$ , -10 °C)  $\delta$  3.99 (br. s); IR (KBr) 3113, 3070, 3037, 2932, 2883, 1607, 1591, 1577, 1547, 1464, 1344, 1279, 1262, 1224, 1189, 1157, 1029, 874, 751, 636, 516  $\text{cm}^{-1}$ ; LR-MS (FAB)  $m/z$  (%): 541 (45), 514 ( $\text{M}^+$ , bp), 195 (47); HR-MS (FAB) found 540.2568, calcd. for  $\text{C}_{40}\text{H}_{30}\text{DN}_2$ : 540.2549.

## X-ray Analyses

Crystal data for **1a** $^+\text{OTf}^- \cdot \text{acetone}$ : Crystals were obtained by recrystallizing from acetone.  $\text{C}_{39}\text{H}_{29}\text{N}_2 \cdot \text{CO}_3\text{F}_3\text{S} \cdot \text{C}_3\text{H}_6\text{O}$ ,  $M$  720.80, dark orange plates,  $0.60 \times 0.03 \times 0.02 \text{ mm}^3$ , triclinic  $P1$ bar,  $a = 8.407(4) \text{ \AA}$ ,  $b = 13.578(7) \text{ \AA}$ ,  $c = 15.815(8) \text{ \AA}$ ,  $\alpha = 72.28(2)^\circ$ ,  $\beta = 80.88(2)^\circ$ ,  $\gamma = 89.70(3)^\circ$ ,  $V = 1695.9(14) \text{ \AA}^3$ ,  $\rho(Z = 2) = 1.411 \text{ g cm}^{-3}$ . A total of 6566 unique data ( $2\theta_{\text{max}} = 55^\circ$ ) were measured at  $T = 133 \text{ K}$  by a Rigaku Mercury CCD apparatus (Mo  $\text{K}\alpha$  radiation,  $\lambda = 0.71070 \text{ \AA}$ ). Numerical absorption correction was applied ( $\mu = 1.60 \text{ cm}^{-1}$ ). The structure was solved by the Patterson method and the following expansion (DIRDIF99) and refined by the full-matrix least-squares method on  $F^2$  with anisotropic temperature factors for non-hydrogen atoms. All the hydrogen atoms except for the methine proton (H1) at the C11 carbon were located at the calculated positions and refined with riding. The methine proton (H1) at the C11 carbon was located in the D map and refined with isotropic temperature factors. The final  $R1$  and  $wR2$  values are 0.081 ( $I > 2\sigma I$ ) and 0.197 (all data) for 6555 reflections and 508 parameters. Estimated standard deviations are 0.004-0.01  $\text{\AA}$  for bond lengths and 0.3-0.7° for bond angles, respectively.



Crystal data for **1b**<sup>+</sup>OTf<sup>-</sup>•chloroform: Crystals were obtained by recrystallizing from chloroform. C<sub>41</sub>H<sub>31</sub>N<sub>2</sub>•CO<sub>3</sub>F<sub>3</sub>S•CHCl<sub>3</sub>, *M* 808.14, dark brown plates, 0.60 × 0.20 × 0.02 mm<sup>3</sup>, triclinic *P*1bar, *a* = 8.208(2) Å, *b* = 14.152(4) Å, *c* = 16.716(5) Å,  $\alpha$  = 109.750(5)°,  $\beta$  = 97.638(5)°,  $\gamma$  = 90.402(3)°, *V* = 1808.4(9) Å<sup>3</sup>,  $\rho$ (*Z* = 2) = 1.484 g cm<sup>-3</sup>. A total of 7678 unique data ( $2\theta_{\max}$  = 55°) were measured at *T* = 103 K by a Rigaku Mercury CCD apparatus (Mo K $\alpha$  radiation,  $\lambda$  = 0.71070 Å). Numerical absorption correction was applied ( $\mu$  = 3.71 cm<sup>-1</sup>). The structure was solved by the direct method (SIR97) and refined by the full-matrix least-squares method on *F*<sup>2</sup> with anisotropic temperature factors for non-hydrogen atoms. All the hydrogen atoms except for the methine proton (H1) at the C13 carbon were located at the calculated positions and refined with riding. The methine proton (H1) at the C13 carbon was located in the D map and refined with isotropic temperature factors. The final *R*1 and *wR*2 values are 0.054 (*I* > 2 $\sigma$ *I*) and 0.128 (all data) for 7678 reflections and 522 parameters. Estimated standard deviations are 0.002-0.005 Å for bond lengths and 0.1-0.3° for bond angles, respectively.

Crystal data for **3a**: Crystals were obtained by recrystallizing from CH<sub>2</sub>Cl<sub>2</sub>/hexane. C<sub>37</sub>H<sub>26</sub>N<sub>2</sub>, *M* 498.63, orange prism, 0.80 × 0.15 × 0.10 mm<sup>3</sup>, monoclinic *Cc*, *a* = 9.057(2) Å, *b* = 19.794(3) Å, *c* = 14.905(3) Å,  $\beta$  = 104.157(3)°, *V* = 2590.8(7) Å<sup>3</sup>,  $\rho$ (*Z* = 4) = 1.278 g cm<sup>-3</sup>. A total of 5151 unique data ( $2\theta_{\max}$  = 55°) were measured at *T* = 103 K by a Rigaku Mercury CCD apparatus (Mo K $\alpha$  radiation,  $\lambda$  = 0.71070 Å). Numerical absorption correction was applied ( $\mu$  = 3.71 cm<sup>-1</sup>). The structure was solved by the direct method (SIR97) and refined by the full-matrix least-squares method on *F*<sup>2</sup> with anisotropic temperature factors for non-hydrogen atoms. All the hydrogen atoms except for the methine proton (H1) at the C24 carbon were located at the calculated positions and refined with riding. The methine proton (H1) at the C24 carbon was located in the D map and refined with isotropic temperature factors. The final *R*1 and *wR*2 values are 0.042 (*I* > 2 $\sigma$ *I*) and 0.096 (all data) for 5151 reflections and 382 parameters. Estimated standard deviations are 0.002-0.004 Å for bond lengths and 0.2° for bond angles, respectively.

## Computational Methods

The DFT calculations were performed with the Gaussian 98 program package.<sup>6</sup> The geometries of the compounds were optimized by using the B3LYP method in combination with the 6-31G\* basis set.

## Redox Potential Measurements

Redox potentials ( $E^{\text{ox}}$  and  $E^{\text{red}}$ ) were measured by cyclic voltammetry in dry MeCN containing  $0.1 \text{ mol dm}^{-3}$   $\text{Et}_4\text{NClO}_4$  as a supporting electrolyte. Ferrocene undergoes 1e-oxidation at +0.38 V under the same conditions. All of the values shown in the text are in  $E/\text{V}$  vs SCE measured at the scan rate of  $100 \text{ mV s}^{-1}$ . A Pt disk electrode was used as the working and counter electrodes, respectively. The working electrode was polished using a water suspension of  $\text{Al}_2\text{O}_3$  ( $0.05 \text{ }\mu\text{m}$ ) before use. The irreversible half-wave potentials were estimated from the anodic peak potentials ( $E^{\text{pa}}$ ) as  $E^{\text{ox}} = E^{\text{pa}} - 0.03$  or the cathodic peak potentials ( $E^{\text{pc}}$ ) as  $E^{\text{red}} = E^{\text{pc}} + 0.03$ .

VT-NMR data of  $1b^+OTf^-$  salt in  $CD_2Cl_2$ 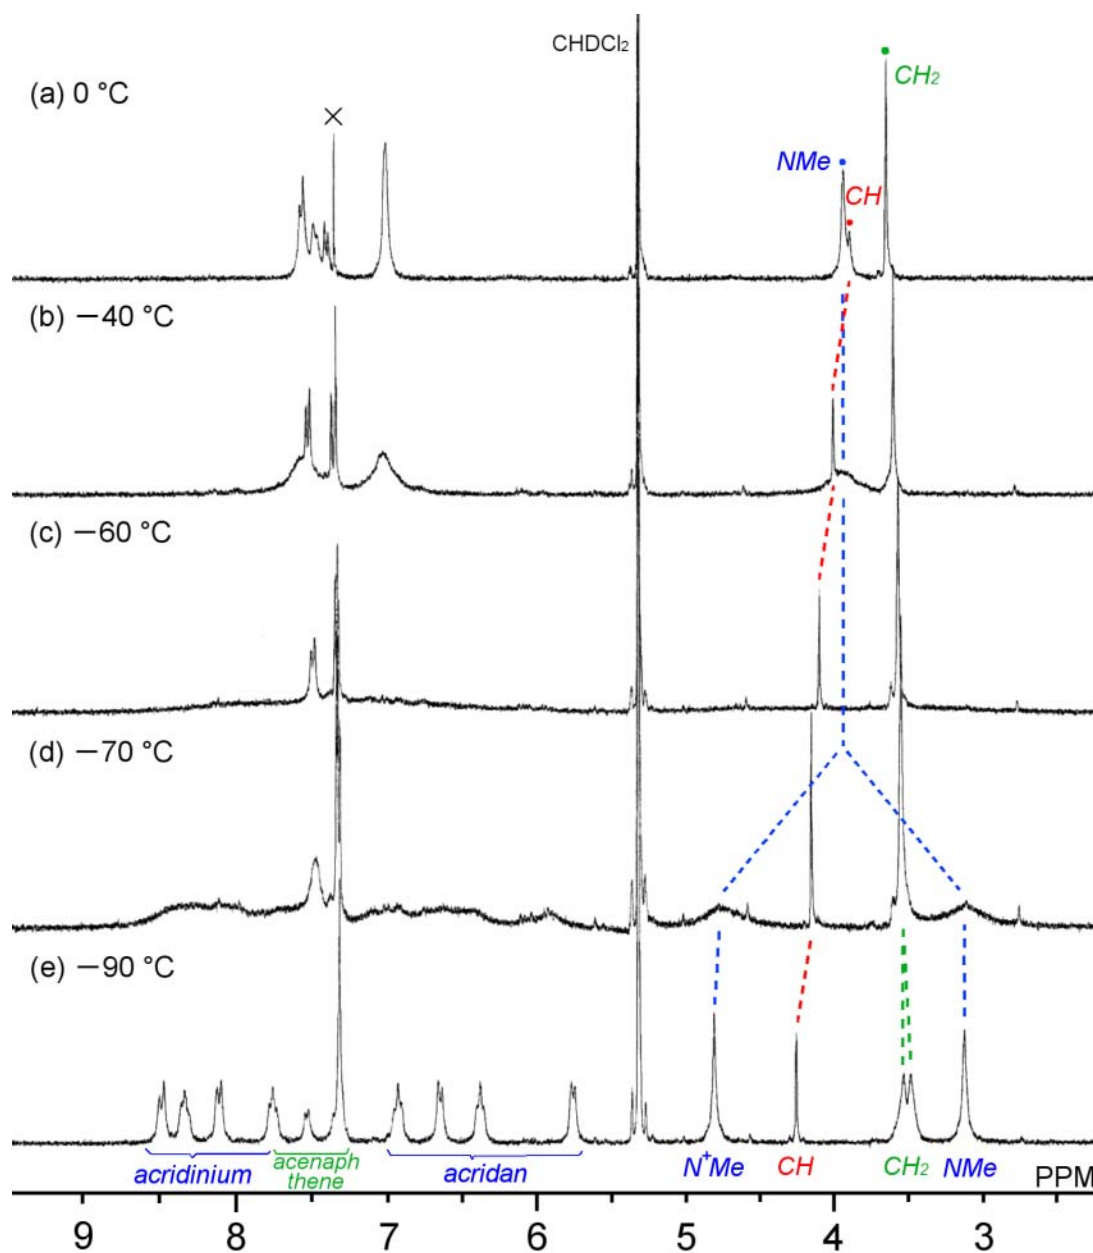

**Figure S1.** VT-NMR spectra of  $1b^+OTf^-$  at a) 0 °C, b) -40°C, c) -60°C, d) -70°C, and e) -90 °C in  $CD_2Cl_2$

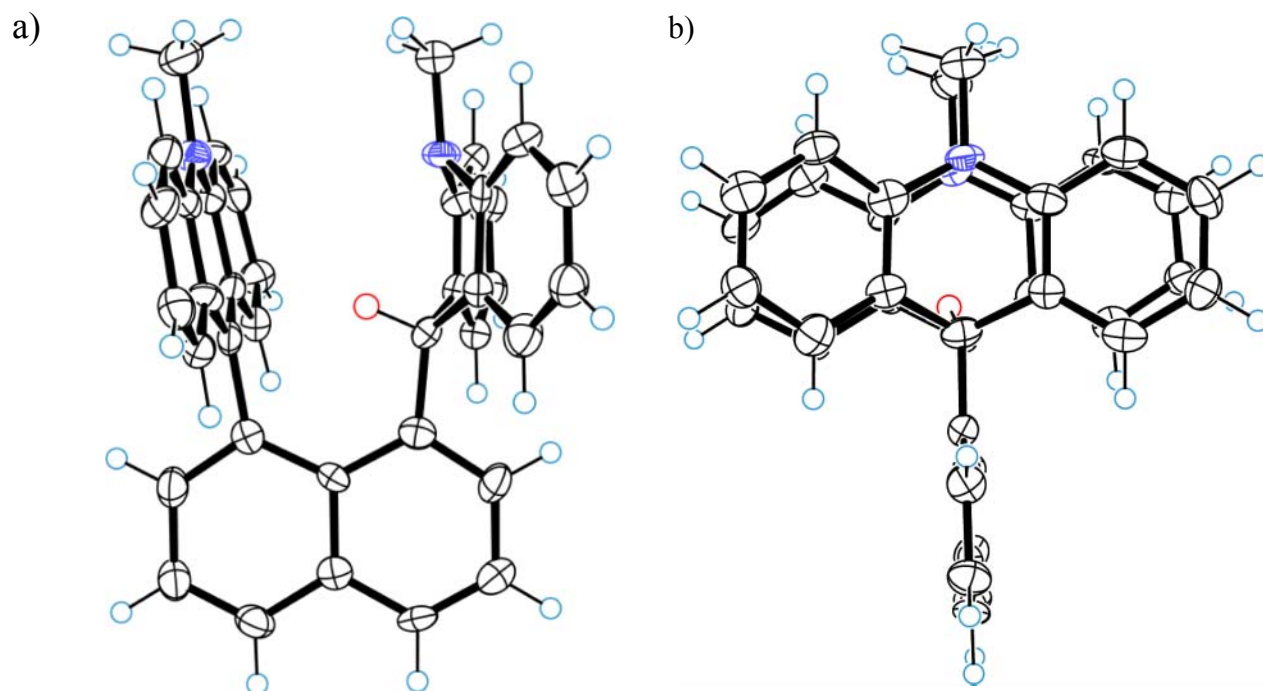

**Figure S2.** ORTEP drawing of  $1a^+$  in  $1a^+OTf^-$  acetone solvate determined by X-ray analysis at 133 K: (a) top view and (b) side view.

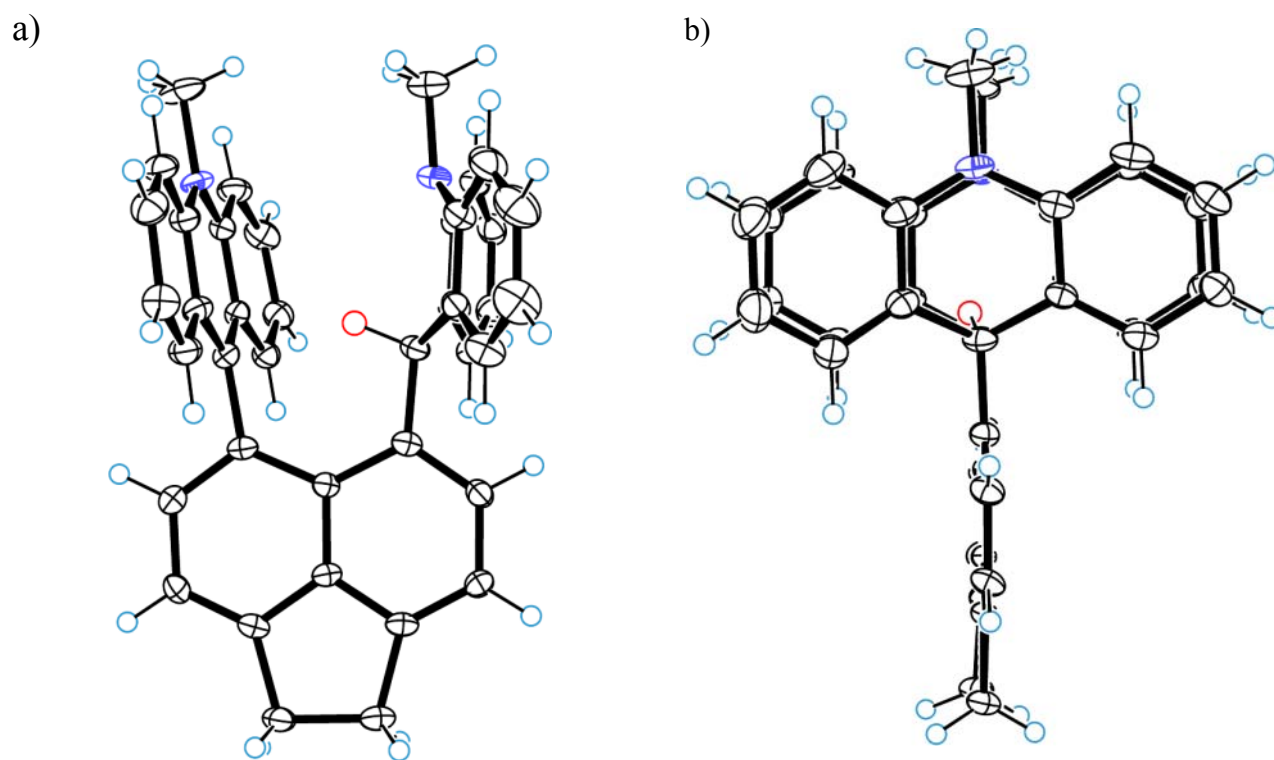

**Figure S3.** ORTEP drawing of  $1b^+$  in  $1b^+OTf^-$  chloroform solvate determined by X-ray analysis at 103 K: (a) top view and (b) side view.

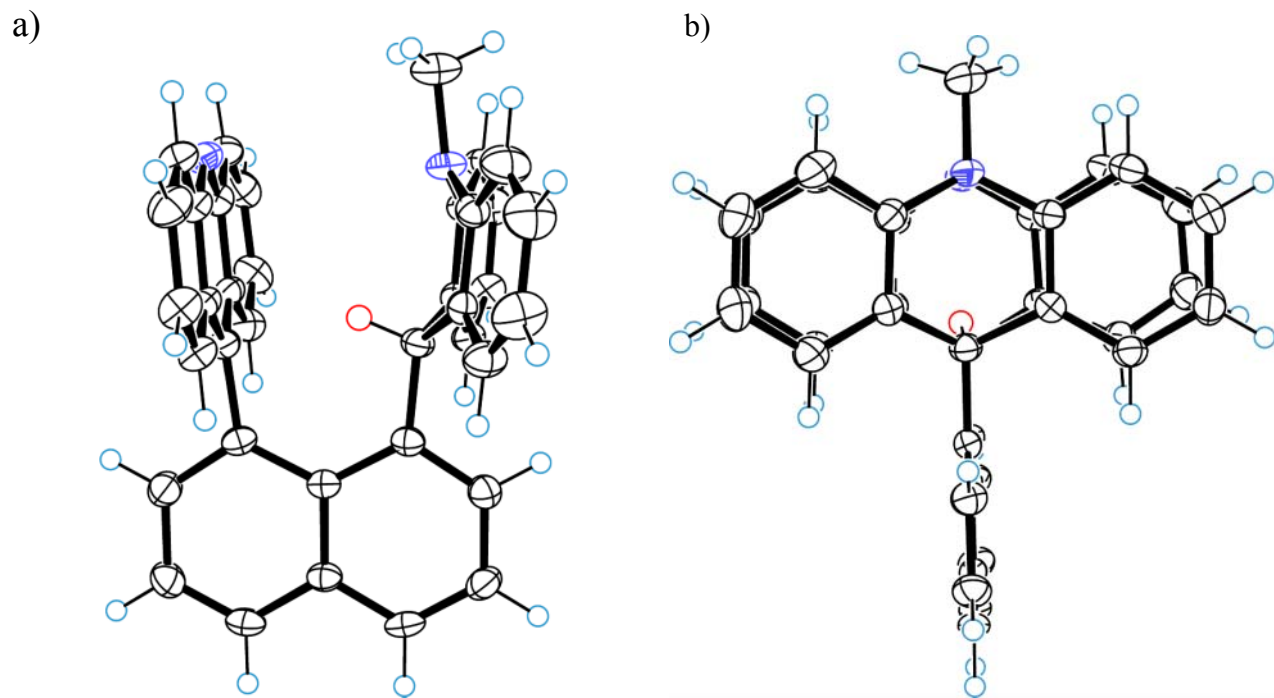

**Figure S4.** ORTEP drawing of **3a** determined by X-ray analysis at 113 K: (a) top view and (b) side view.

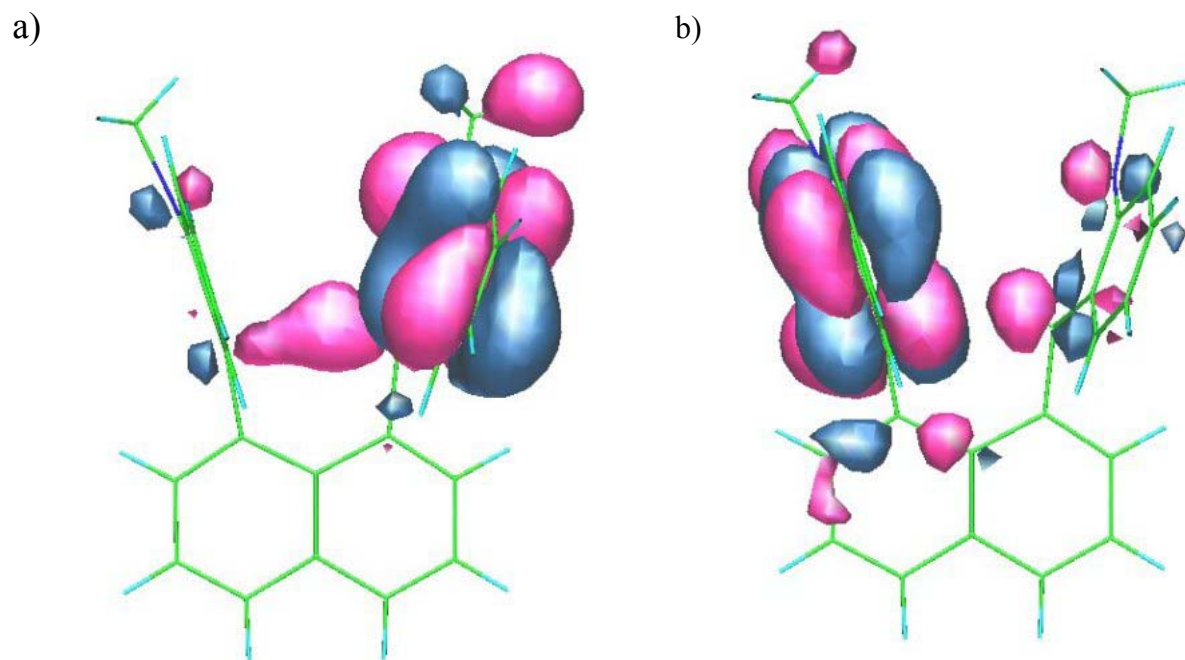

**Figure S5.** (a) HOMO (-7.4066 eV) and (b) LUMO (-5.9623 eV) of  $\mathbf{1a}^+$  calculated by B3LYP/6-31G\*.

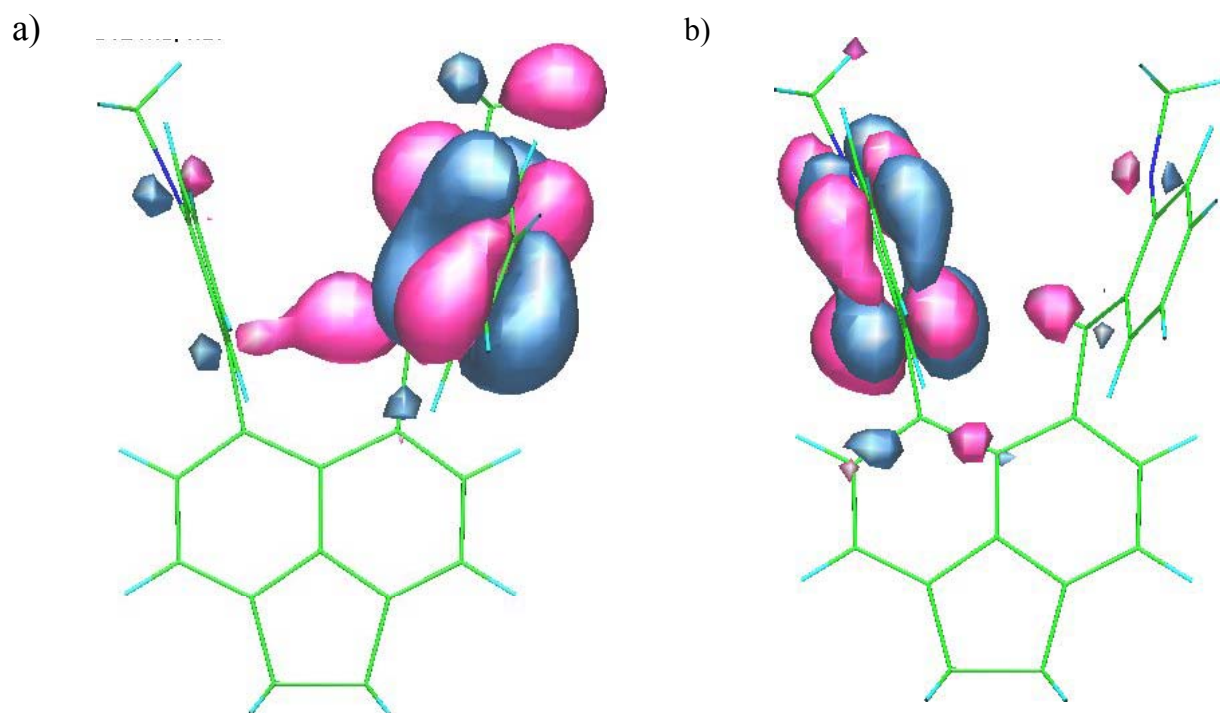

**Figure S6.** (a) HOMO (-7.2908 eV) and (b) LUMO (-5.9265 eV) of  $\mathbf{1b}^+$  calculated by B3LYP/6-31G\*.

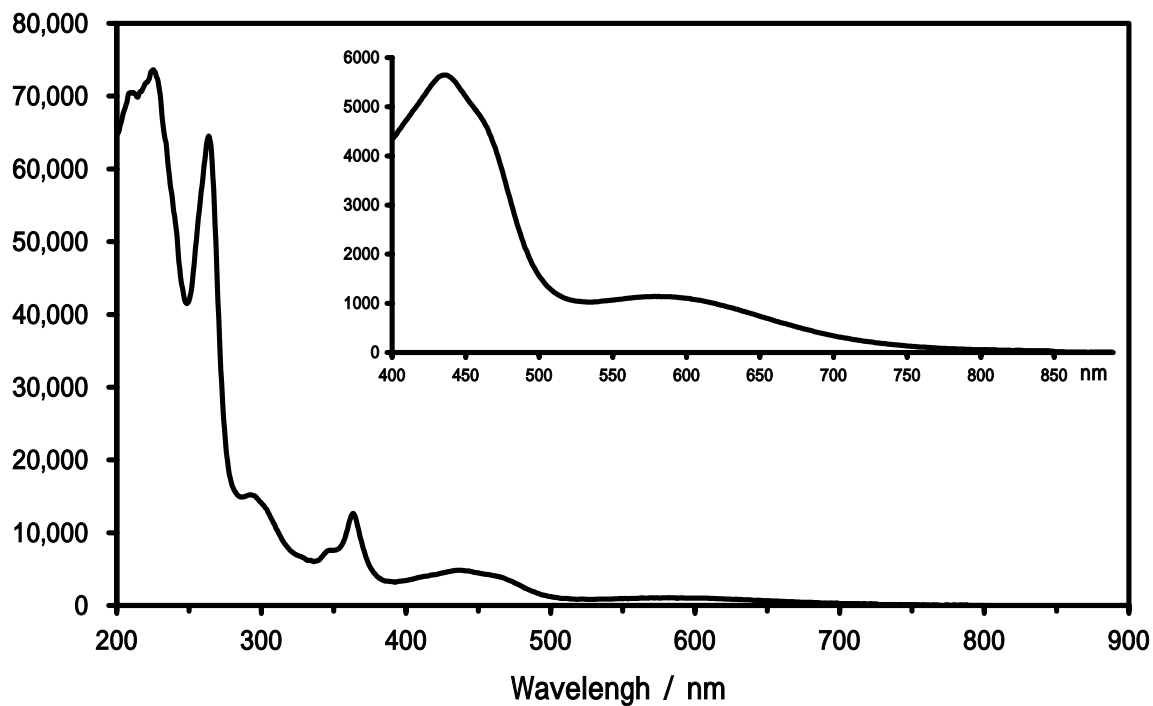

**Figure S7.** UV/Vis spectrum of **1a**<sup>+</sup>OTf<sup>-</sup> in CH<sub>3</sub>CN. Inset: a magnified spectra in a long wavelength absorption band.

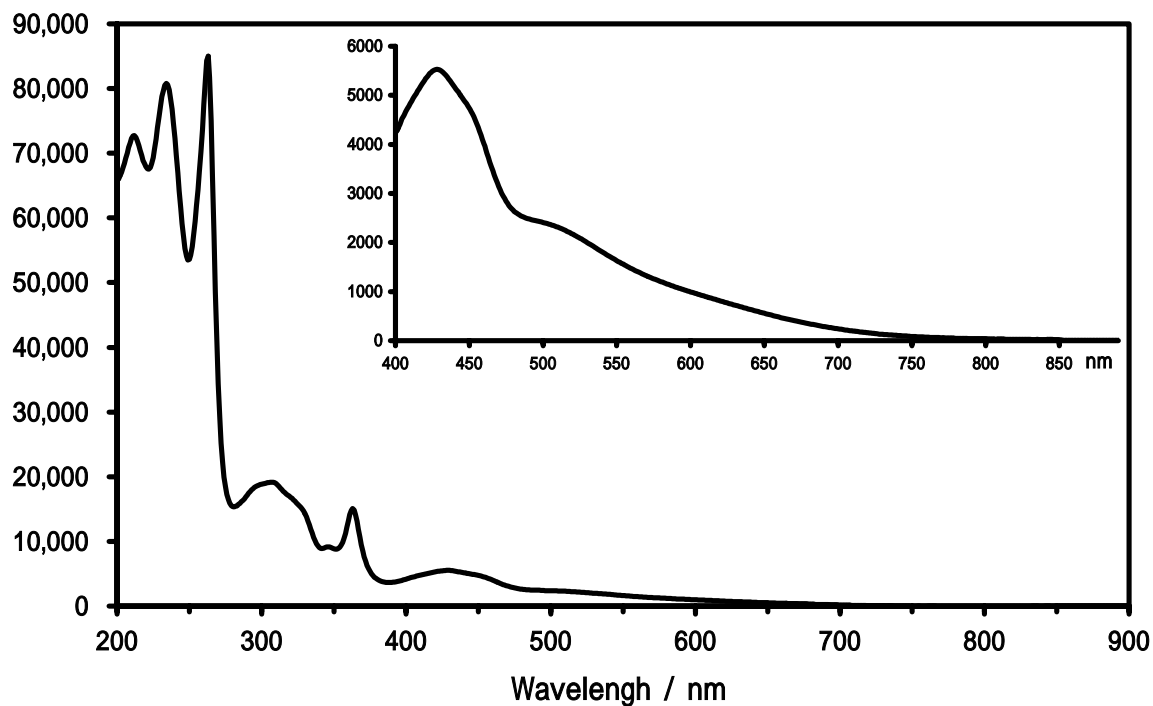

**Figure S8.** UV/Vis spectrum of **1b**<sup>+</sup>OTf<sup>-</sup> in CH<sub>3</sub>CN. Inset: a magnified spectra in a long wavelength absorption band.

**Optimized geometry of 1a<sup>+</sup> at B3LYP/6-31G(d)**

```
# B3LYP/6-31G(d) Opt Pop=Full FChk=All
Stoichiometry   C38H29N2(1+)
Framework group  C1[X(C38H29N2)]
Deg. of freedom  201
```

```
SCF Done:  E(RB+HF-LYP) = -1574.83945271      A.U.
      Item                Value      Threshold  Converged?
Maximum Force                0.000076      0.000450      YES
RMS      Force                0.000012      0.000300      YES
Maximum Displacement         0.000120      0.001800      YES
RMS      Displacement        0.000027      0.001200      YES
Predicted change in Energy=-3.433154D-07
Optimization completed.
-- Stationary point found.
```

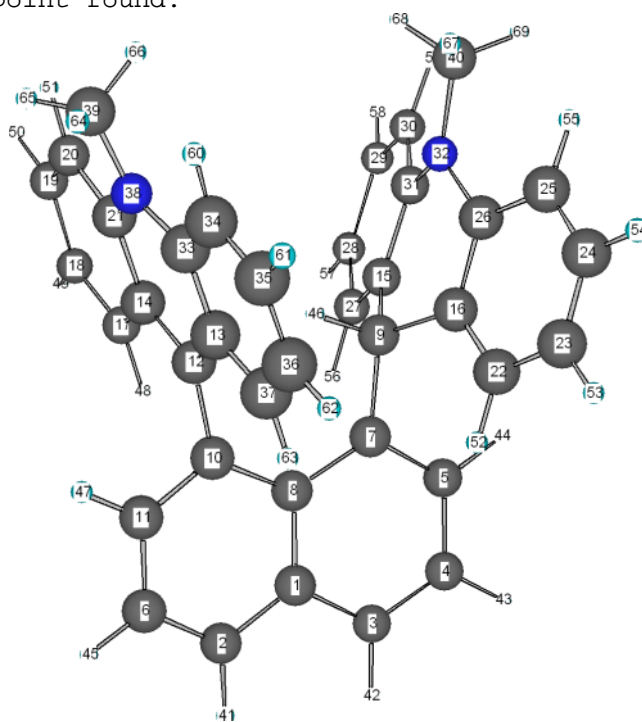

| Center<br>Number | Atomic<br>Number | Atomic<br>Type | Coordinates (Angstroms) |           |           |
|------------------|------------------|----------------|-------------------------|-----------|-----------|
|                  |                  |                | X                       | Y         | Z         |
| 1                | 6                | 0              | -4.025852               | -0.237043 | 0.001659  |
| 2                | 6                | 0              | -4.877727               | 0.898987  | -0.005447 |
| 3                | 6                | 0              | -4.609109               | -1.529999 | 0.008997  |
| 4                | 6                | 0              | -3.822223               | -2.654812 | 0.015231  |
| 5                | 6                | 0              | -2.421172               | -2.516164 | 0.013797  |
| 6                | 6                | 0              | -4.365063               | 2.170768  | -0.013099 |
| 7                | 6                | 0              | -1.791499               | -1.282046 | 0.007043  |
| 8                | 6                | 0              | -2.587479               | -0.084355 | 0.001117  |
| 9                | 6                | 0              | -0.269043               | -1.283622 | 0.003761  |
| 10               | 6                | 0              | -2.088448               | 1.271553  | -0.005749 |
| 11               | 6                | 0              | -2.966593               | 2.345605  | -0.013042 |
| 12               | 6                | 0              | -0.646499               | 1.691628  | -0.004016 |
| 13               | 6                | 0              | 0.009156                | 1.989072  | 1.219143  |
| 14               | 6                | 0              | 0.013515                | 1.985217  | -1.225719 |



|    |   |   |           |           |           |
|----|---|---|-----------|-----------|-----------|
| 15 | 6 | 0 | 0.353265  | -1.887391 | -1.249909 |
| 16 | 6 | 0 | 0.359632  | -1.882758 | 1.256483  |
| 17 | 6 | 0 | -0.589526 | 1.691431  | -2.482771 |
| 18 | 6 | 0 | 0.067805  | 1.934588  | -3.663625 |
| 19 | 6 | 0 | 1.371210  | 2.473327  | -3.632230 |
| 20 | 6 | 0 | 1.990295  | 2.786860  | -2.438332 |
| 21 | 6 | 0 | 1.323481  | 2.570303  | -1.209194 |
| 22 | 6 | 0 | -0.330610 | -2.031726 | 2.463064  |
| 23 | 6 | 0 | 0.306535  | -2.486316 | 3.616730  |
| 24 | 6 | 0 | 1.662991  | -2.804838 | 3.564946  |
| 25 | 6 | 0 | 2.372783  | -2.674475 | 2.373847  |
| 26 | 6 | 0 | 1.735456  | -2.206487 | 1.211545  |
| 27 | 6 | 0 | -0.343249 | -2.041059 | -2.452281 |
| 28 | 6 | 0 | 0.288025  | -2.499804 | -3.607527 |
| 29 | 6 | 0 | 1.644886  | -2.817530 | -3.561666 |
| 30 | 6 | 0 | 2.360880  | -2.682551 | -2.374788 |
| 31 | 6 | 0 | 1.729354  | -2.210804 | -1.210842 |
| 32 | 7 | 0 | 2.432659  | -2.059893 | -0.001680 |
| 33 | 6 | 0 | 1.319015  | 2.574348  | 1.205364  |
| 34 | 6 | 0 | 1.981411  | 2.795469  | 2.436078  |
| 35 | 6 | 0 | 1.358172  | 2.485837  | 3.628832  |
| 36 | 6 | 0 | 0.054826  | 1.946786  | 3.657355  |
| 37 | 6 | 0 | -0.598290 | 1.699470  | 2.475021  |
| 38 | 7 | 0 | 1.904045  | 2.912053  | -0.001414 |
| 39 | 6 | 0 | 3.156083  | 3.690855  | 0.000087  |
| 40 | 6 | 0 | 3.884590  | -2.164918 | -0.005358 |
| 41 | 1 | 0 | -5.952145 | 0.736546  | -0.004963 |
| 42 | 1 | 0 | -5.692794 | -1.608691 | 0.009355  |
| 43 | 1 | 0 | -4.267414 | -3.645048 | 0.020769  |
| 44 | 1 | 0 | -1.802503 | -3.409116 | 0.017780  |
| 45 | 1 | 0 | -5.016989 | 3.038582  | -0.018754 |
| 46 | 1 | 0 | 0.056821  | -0.230872 | 0.001048  |
| 47 | 1 | 0 | -2.564093 | 3.355210  | -0.018246 |
| 48 | 1 | 0 | -1.584484 | 1.263317  | -2.484210 |
| 49 | 1 | 0 | -0.402181 | 1.701222  | -4.612961 |
| 50 | 1 | 0 | 1.907307  | 2.640586  | -4.561558 |
| 51 | 1 | 0 | 3.001957  | 3.167826  | -2.463956 |
| 52 | 1 | 0 | -1.387739 | -1.789920 | 2.497286  |
| 53 | 1 | 0 | -0.252528 | -2.596893 | 4.540880  |
| 54 | 1 | 0 | 2.173574  | -3.177192 | 4.448558  |
| 55 | 1 | 0 | 3.414660  | -2.970859 | 2.348013  |
| 56 | 1 | 0 | -1.400581 | -1.799544 | -2.481881 |
| 57 | 1 | 0 | -0.275827 | -2.614233 | -4.528291 |
| 58 | 1 | 0 | 2.150997  | -3.192821 | -4.446612 |
| 59 | 1 | 0 | 3.403077  | -2.978110 | -2.353415 |
| 60 | 1 | 0 | 2.992769  | 3.177075  | 2.463858  |
| 61 | 1 | 0 | 1.890826  | 2.656536  | 4.559511  |
| 62 | 1 | 0 | -0.418508 | 1.716573  | 4.605802  |
| 63 | 1 | 0 | -1.593121 | 1.271079  | 2.474436  |
| 64 | 1 | 0 | 3.175753  | 4.340400  | 0.872227  |
| 65 | 1 | 0 | 3.183688  | 4.331578  | -0.878217 |
| 66 | 1 | 0 | 4.031644  | 3.034178  | 0.007333  |
| 67 | 1 | 0 | 4.282952  | -1.658515 | 0.876222  |
| 68 | 1 | 0 | 4.278323  | -1.660283 | -0.890139 |
| 69 | 1 | 0 | 4.243734  | -3.204182 | -0.005246 |

---

**Optimized geometry of 1b<sup>+</sup> at B3LYP/6-31G(d)**

```
# B3LYP/6-31G(d) Opt Pop=Full FChk=All
Stoichiometry   C40H31N2(1+)
Framework group C1[X(C40H31N2)]
Deg. of freedom  213
```

```
SCF Done:  E(RB+HF-LYP) =  -1652.26840660      A.U.
      Item                Value      Threshold Converged?
Maximum Force           0.000009       0.000450      YES
RMS      Force           0.000001       0.000300      YES
Maximum Displacement     0.000519       0.001800      YES
RMS      Displacement     0.000098       0.001200      YES
Predicted change in Energy=-2.509643D-09
Optimization completed.
-- Stationary point found.
```

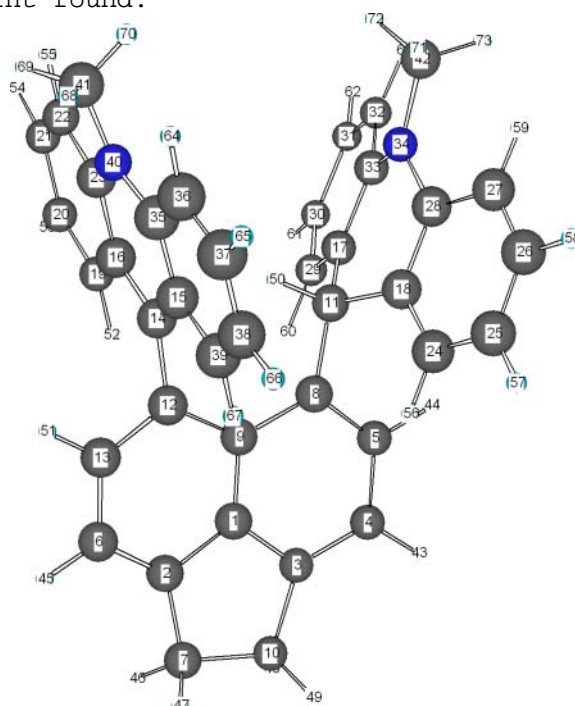

| Center<br>Number | Atomic<br>Number | Atomic<br>Type | Coordinates (Angstroms) |           |           |
|------------------|------------------|----------------|-------------------------|-----------|-----------|
|                  |                  |                | X                       | Y         | Z         |
| 1                | 6                | 0              | 3.644807                | 0.027913  | -0.000205 |
| 2                | 6                | 0              | 4.503387                | 1.152707  | -0.000074 |
| 3                | 6                | 0              | 4.382219                | -1.178077 | -0.000351 |
| 4                | 6                | 0              | 3.697839                | -2.371486 | -0.000371 |
| 5                | 6                | 0              | 2.284985                | -2.336763 | -0.000241 |
| 6                | 6                | 0              | 3.954523                | 2.413104  | 0.000163  |
| 7                | 6                | 0              | 5.947051                | 0.690809  | -0.000148 |
| 8                | 6                | 0              | 1.533247                | -1.166156 | -0.000130 |
| 9                | 6                | 0              | 2.220949                | 0.093625  | -0.000132 |
| 10               | 6                | 0              | 5.866222                | -0.869887 | -0.000447 |
| 11               | 6                | 0              | 0.016189                | -1.288942 | 0.000063  |
| 12               | 6                | 0              | 1.683526                | 1.433643  | 0.000039  |
| 13               | 6                | 0              | 2.544682                | 2.527810  | 0.000226  |
| 14               | 6                | 0              | 0.228422                | 1.792138  | -0.000043 |

|    |   |   |           |           |           |
|----|---|---|-----------|-----------|-----------|
| 15 | 6 | 0 | -0.450101 | 2.036624  | -1.221170 |
| 16 | 6 | 0 | -0.450091 | 2.037123  | 1.220984  |
| 17 | 6 | 0 | -0.562323 | -1.940711 | 1.252645  |
| 18 | 6 | 0 | -0.562648 | -1.940755 | -1.252341 |
| 19 | 6 | 0 | 0.168952  | 1.772906  | 2.477351  |
| 20 | 6 | 0 | -0.501707 | 1.972825  | 3.658342  |
| 21 | 6 | 0 | -1.833318 | 2.439090  | 3.628736  |
| 22 | 6 | 0 | -2.469239 | 2.722702  | 2.436489  |
| 23 | 6 | 0 | -1.791691 | 2.546101  | 1.206523  |
| 24 | 6 | 0 | 0.142176  | -2.052635 | -2.453596 |
| 25 | 6 | 0 | -0.457315 | -2.558777 | -3.606723 |
| 26 | 6 | 0 | -1.788959 | -2.967852 | -3.558536 |
| 27 | 6 | 0 | -2.511613 | -2.877309 | -2.370974 |
| 28 | 6 | 0 | -1.912601 | -2.358482 | -1.210416 |
| 29 | 6 | 0 | 0.142779  | -2.052495 | 2.453744  |
| 30 | 6 | 0 | -0.456421 | -2.558639 | 3.607027  |
| 31 | 6 | 0 | -1.788029 | -2.967856 | 3.559148  |
| 32 | 6 | 0 | -2.510961 | -2.877389 | 2.371745  |
| 33 | 6 | 0 | -1.912260 | -2.358507 | 1.211060  |
| 34 | 7 | 0 | -2.622519 | -2.250220 | 0.000421  |
| 35 | 6 | 0 | -1.791641 | 2.545721  | -1.206840 |
| 36 | 6 | 0 | -2.469187 | 2.722184  | -2.436822 |
| 37 | 6 | 0 | -1.833327 | 2.438147  | -3.629007 |
| 38 | 6 | 0 | -0.501799 | 1.971648  | -3.658495 |
| 39 | 6 | 0 | 0.168884  | 1.771989  | -2.477467 |
| 40 | 7 | 0 | -2.391533 | 2.854326  | -0.000217 |
| 41 | 6 | 0 | -3.687135 | 3.558657  | -0.000606 |
| 42 | 6 | 0 | -4.063151 | -2.455870 | 0.000657  |
| 43 | 1 | 0 | 4.212143  | -3.328520 | -0.000462 |
| 44 | 1 | 0 | 1.747005  | -3.280934 | -0.000219 |
| 45 | 1 | 0 | 4.565559  | 3.311095  | 0.000305  |
| 46 | 1 | 0 | 6.483886  | 1.069470  | 0.877305  |
| 47 | 1 | 0 | 6.483941  | 1.069815  | -0.877418 |
| 48 | 1 | 0 | 6.362924  | -1.299957 | 0.876908  |
| 49 | 1 | 0 | 6.362689  | -1.299573 | -0.878127 |
| 50 | 1 | 0 | -0.390693 | -0.264593 | 0.000089  |
| 51 | 1 | 0 | 2.111844  | 3.525354  | 0.000389  |
| 52 | 1 | 0 | 1.186258  | 1.401184  | 2.475465  |
| 53 | 1 | 0 | -0.020525 | 1.760976  | 4.607143  |
| 54 | 1 | 0 | -2.377678 | 2.572239  | 4.558796  |
| 55 | 1 | 0 | -3.500534 | 3.046821  | 2.463490  |
| 56 | 1 | 0 | 1.180433  | -1.739079 | -2.484342 |
| 57 | 1 | 0 | 0.112386  | -2.638047 | -4.527687 |
| 58 | 1 | 0 | -2.269106 | -3.379985 | -4.441623 |
| 59 | 1 | 0 | -3.531276 | -3.243138 | -2.346683 |
| 60 | 1 | 0 | 1.181019  | -1.738856 | 2.484255  |
| 61 | 1 | 0 | 0.113487  | -2.637780 | 4.527873  |
| 62 | 1 | 0 | -2.267946 | -3.380030 | 4.442339  |
| 63 | 1 | 0 | -3.530586 | -3.243341 | 2.347660  |
| 64 | 1 | 0 | -3.500386 | 3.046602  | -2.463835 |
| 65 | 1 | 0 | -2.377654 | 2.571186  | -4.559102 |
| 66 | 1 | 0 | -0.020665 | 1.759475  | -4.607248 |
| 67 | 1 | 0 | 1.186161  | 1.400186  | -2.475507 |
| 68 | 1 | 0 | -3.747284 | 4.201931  | -0.875449 |
| 69 | 1 | 0 | -3.748988 | 4.200037  | 0.875455  |
| 70 | 1 | 0 | -4.522396 | 2.851461  | -0.002157 |
| 71 | 1 | 0 | -4.493597 | -1.979229 | -0.882660 |
| 72 | 1 | 0 | -4.493277 | -1.979305 | 0.884166  |
| 73 | 1 | 0 | -4.350714 | -3.517458 | 0.000630  |

## References

- (1) a) Hodgson, H. H.; Whitehurst, J. S. *J. Chem. Soc.* **1948**, 80. b) Seyferth, D.; Vick, S. C. *J. Organomet. Chem.* **1977**, 141, 173. c) Vyskočil, Š.; Meca, L.; Tišlerová, I.; Čísařová, I.; Polášek, M.; Harutyunyan, S. R.; Belokon, Y. N.; Stead, R. M. J.; Farrugia, L.; Lockhart, S. C.; Mitchell, W. L.; Kočovský, P. *Chem. Eur. J.* **2002**, 8, 4633.
- (2) a) N. Tanaka, T. Kasai, *Bull. Chem. Soc. Jpn.* **1981**, 54, 3020. b) Neudorff, W. D.; Lentz, D.; Anibarro, M.; Schlüter, A. D. *Chem. Eur. J.* **2003**, 9, 2745.
- (3) Acheson, R. M.; Adcock, B.; Glover, G. M.; Sutton, L. E. *J. Chem. Soc.* **1960**, 3367.
- (4) Kawai, H.; Takeda, T.; Fujiwara, K.; Suzuki, T. *Tetrahedron Lett.* **2004**, 45, 8289.
- (5) Wolf, C.; Mei, X. *J. Am. Chem. Soc.* **2003**, 125, 10651.
- (6) Frisch, M. J.; Trucks, G. W.; Schlegel, H. B.; Scuseria, G. E.; Robb, M. A.; Cheeseman, J. R.; Zakrzewski, V. G.; Montgomery, J. A.; Stratmann, R. E.; Burant, J. C.; Dapprich, S.; Millam, J. M.; Daniels, A. D.; Kudin, K. N.; Strain, M. C.; Farkas, O.; Tomasi, J.; Barone, V.; Cossi, M.; Cammi, R.; Mennucci, B.; Pomelli, C.; Adamo, C.; Clifford, S.; Ochterski, J.; Petersson, G. A.; Ayala, P. Y.; Cui, Q.; Morokuma, K.; Malick, D. K.; Rabuck, A. D.; Raghavachari, K.; Foresman, J. B.; Cioslowski, J.; Ortiz, J. V.; Stefanov, B. B.; Liu, G.; Liashenko, A.; Piskorz, P.; Komaromi, I.; Gomperts, R.; Martin, R. L.; Fox, D. J.; Keith, T.; Al-Laham, M. A.; Peng, C. Y.; Nanayakkara, A.; Gonzalez, C.; Challacombe, M.; Gill, P. M. W.; Johnson, B.; Chen, W.; Wong, M. W.; Andres, J. L.; Gonzalez, C.; Head-Gordon, M.; Replogle, E. S.; Pople, J. A. *Gaussian*, Pittsburg, PA, 1998.
